# Supplementary material
Source: PubMed Central journal article supplement (PMC7437180)

**A**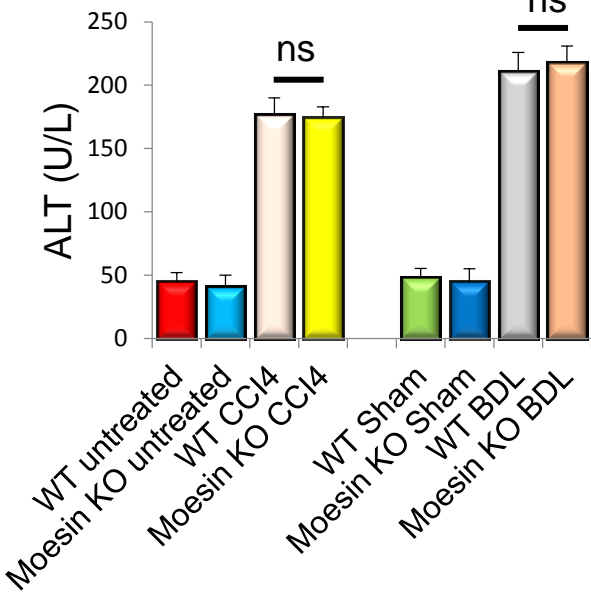**B**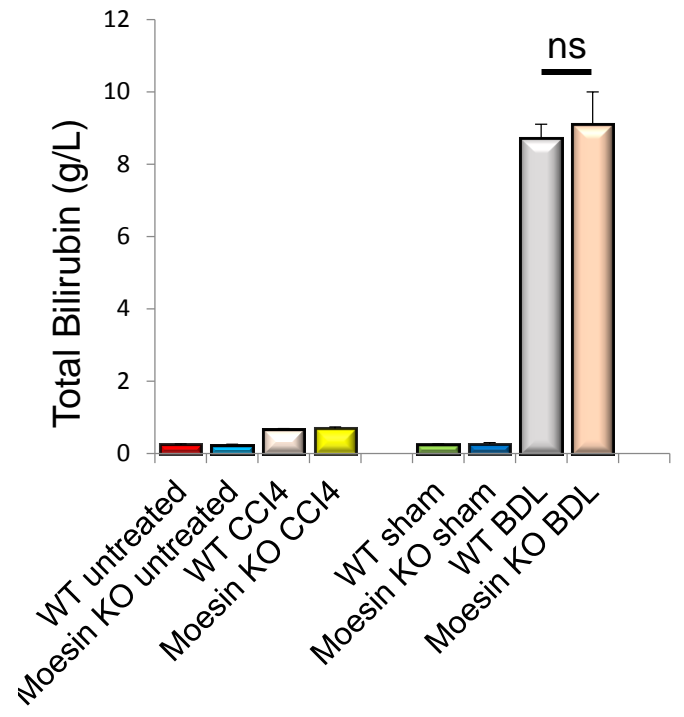

Figure S1

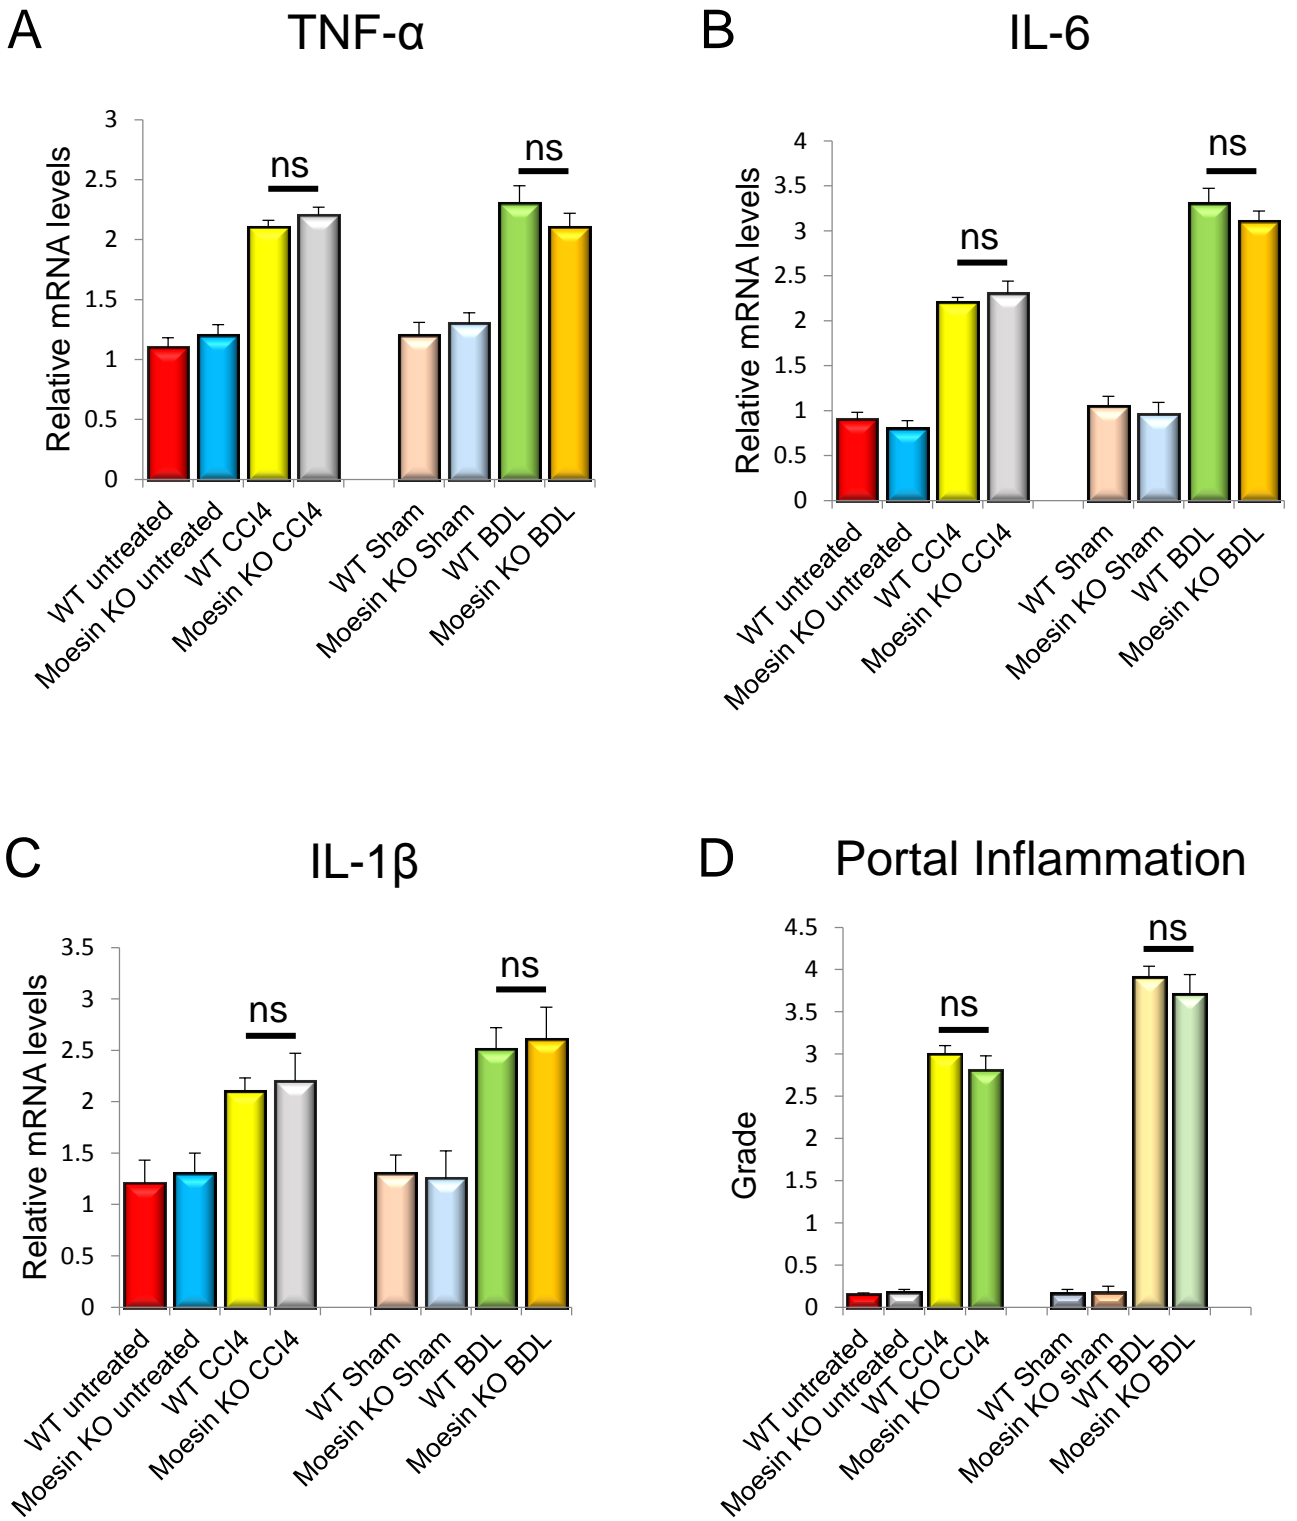

Figure S2

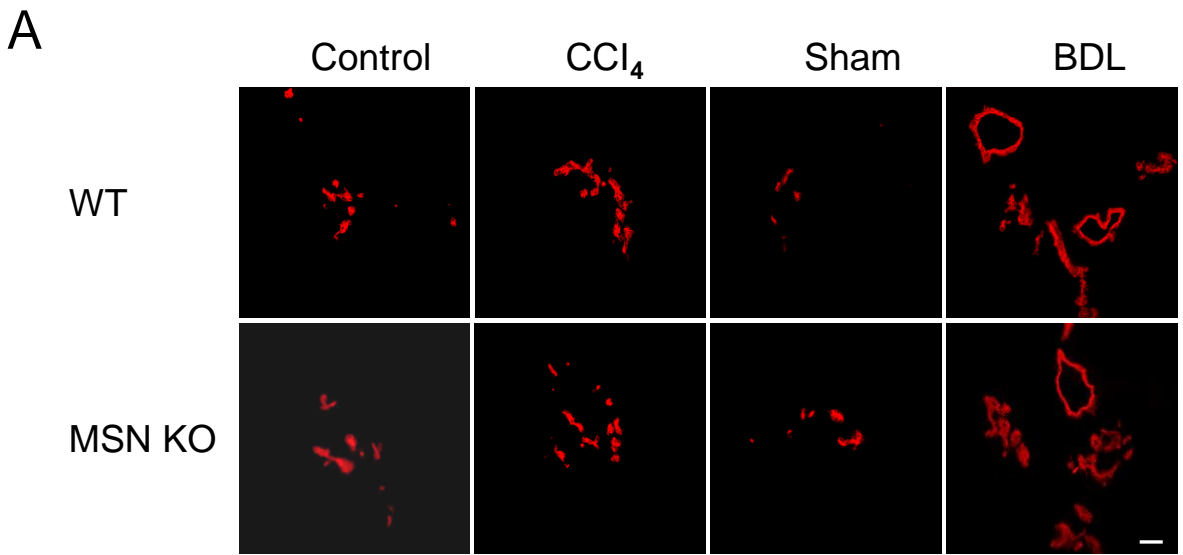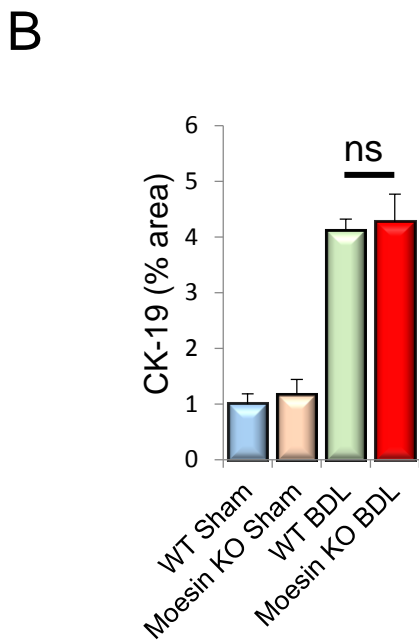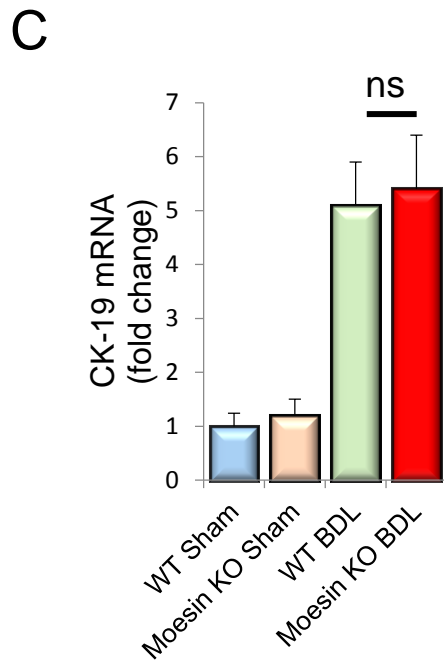

Figure S3

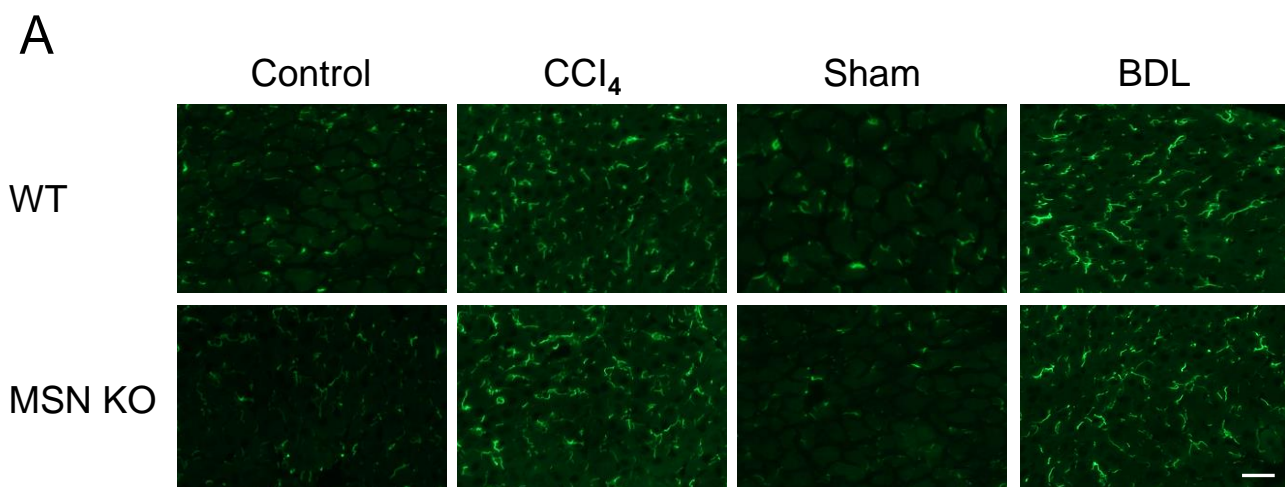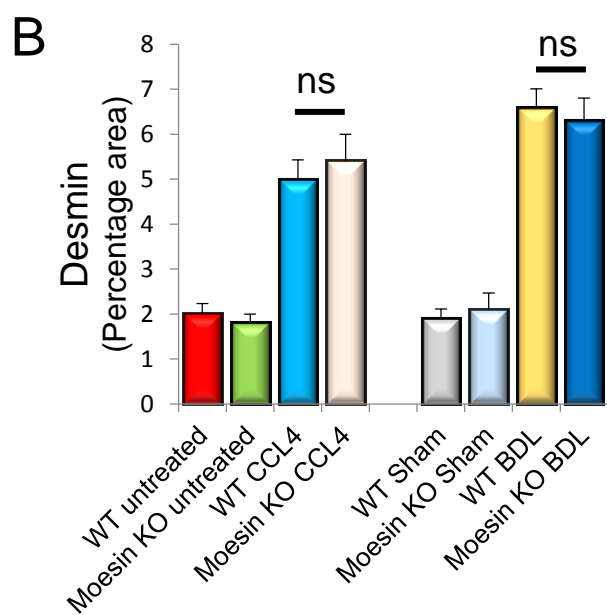

Figure S4

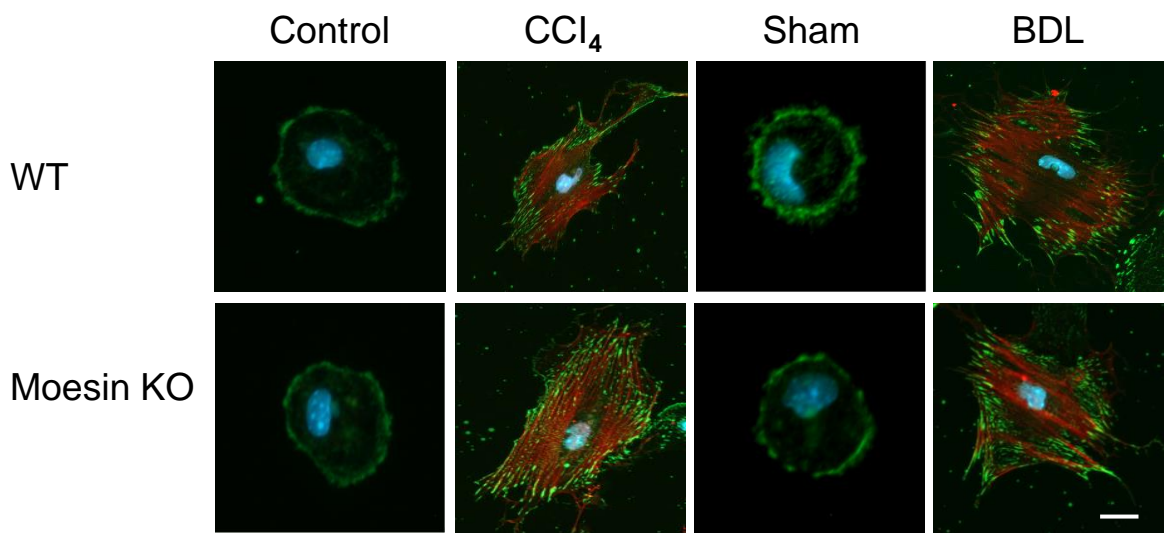

Figure S5

Supplement: NIHMS1614943-supplement-1.pdf [file NIHMS1614943-supplement-1.pdf]
